# Supplementary material for: Genomic analysis of Strongyloides stercoralis and Strongyloides fuelleborni in Bangladesh
Source: bioRxiv or medRxiv preprint supplement (doi:10.1101/2024.05.16.24307305), 2024-05-16

1 **Supplementary File 3 to**

2

3 **Genomic analysis of *Strongyloides stercoralis* and *Strongyloides fuelleborni***

4 **in Bangladesh**

5

6 Veroni de Ree<sup>1</sup>, Tilak Nath<sup>2</sup>, Dorothee Harbecke<sup>1</sup>, Dongmin Lee<sup>3</sup>, Christian

7 Rödelsperger<sup>1</sup> and Adrian Streit<sup>1\*</sup>

8

9 **Worms belonging to the "dog only" type show high apparent heterozygosity**  
10 **that is likely caused in part by structural variations, rather than true**  
11 **heterozygosity**

12 When we attempted to include the "dog only" type worms (including the one  
13 isolated from a human host) in the heterozygosity analysis we noticed that they  
14 showed very high apparent heterozygosity. Strikingly, this was also the case for  
15 heterozygosity on the X chromosome in the male worm. To determine if this was  
16 an anomaly of our sample from Bangladesh we subjected the sequences of the  
17 five whole genome sequenced "dog only" type worms from (Jaleta et al., 2017) to  
18 the same analysis (Figure 8 in the body of the publication and Fig.  
19 Suppl\_File\_3\_1). Except for the worm L6, these sequences showed even higher  
20 apparent heterozygosity, including on the X chromosome (all "dog only" type  
21 whole genome sequenced individuals by (Jaleta et al., 2017) were males). Notice  
22 that with respect to the mitochondrial and the nuclear genomes, L6 was the only  
23 whole genome sequenced worm in the study of (Jaleta et al., 2017) that belongs  
24 to a separate sub-cluster of the "dog-only" cluster, of which it is not clear, if it is  
25 more closely related to the other "dog only" cluster (to which the other four  
26 worms and the worms isolated in this study belong) or to the "human and dog"  
27 cluster (compare the positions of L6 in Figures 4-6 in the main body of the paper  
28 and Suppl. Figures 1, 2). For the rest of this Suppl. File 3 "dog only" always means  
29 "dog only" except for L6. L6 is not included in this analysis.

30

31 First, we asked if some of the *S. stercoralis* in Asia, in particular the "dog only"  
32 type might not employ XX/XO sex determination as it is the case in the USA  
33 derived *S. stercoralis* reference isolate (Hunt et al., 2016). We therefore

34 performed read coverage analysis and compared "dog only" cluster males, which  
35 have the high apparent heterozygosity on the autosomes and the X chromosome,  
36 with males and females from the reference isolate (which have low  
37 heterozygosity) and from "human and dog" cluster sequences from China, which  
38 have high heterozygosity but do not show the unexpected apparent  
39 heterozygosity on the X chromosome (Fig. Suppl\_File\_3\_2). The proportional X-  
40 chromosome coverage in all males was comparable and clearly less than in  
41 females, suggesting that all these males do have only one X chromosome. Notice  
42 that free-living adults contain highly polyploid nuclei in the distal part of their  
43 gonads, in which the X chromosome is less amplified, compared with the  
44 autosomes in both sexes (Hammond and Robinson, 1994; Kulkarni et al., 2016).  
45 Therefore, the overall coverage of the X chromosome in free-living adult females  
46 is less than 100% (compared with autosomes) but still more than 50% (in our  
47 cases between 70 and 80%) and less than the expected 50% in males (Hunt et al.,  
48 2016; Kulkarni et al., 2016). In infective larvae, all of which are female and do not  
49 have the polyploid nuclei yet, the coverage of the X is equal to the autosomes  
50 (Fig. Suppl\_File\_3\_2E)

51

52 We then analysed the heterozygosity over the length of the chromosomes. Males  
53 did indeed show low heterozygosity over large portions of the X chromosome  
54 compared with females and with autosomes of both sexes (Fig. Suppl\_File\_3\_3).  
55 However, there are apparent heterozygosity hot spots that dominated the  
56 analysis. These hotspots are also present in females. Also on autosomes, such  
57 heterozygosity hotspots are visible, although less frequent. We think these  
58 hotspots reflect duplications and X to autosome translocations present in the

59 genome of the "dog only" type, compared with the *S. stercoralis* reference  
60 genome (Hunt et al., 2016).  
61 Overall, we think that the heterozygosity detected in the "dog only" worms is at  
62 least partially artificial due to the use of a too different reference genome that  
63 does not contain some duplications and X to autosome translocations present in  
64 these worms. Currently we cannot really tell what portion of the apparent  
65 heterozygosity is real and how much is artificial. The problem appears to be  
66 aggravated on the X chromosome because also females show higher  
67 heterozygosity on the X chromosome than on the autosomes. Also, in the  
68 reference genome, the assembly of the autosomes is better than the one of the X  
69 chromosome. Some of the low but detectable apparent heterozygosity seen on  
70 the X in males of the human derived *S. stercoralis* might also be caused artificially  
71 due to assembly issues.

72

73

#### 74 **Figure legends**

75 Fig. Suppl\_File\_3\_1: Apparent heterozygosity of "human and dog" type worms  
76 from this and previous studies [(Aupalee et al., 2020) Thailand, (Kikuchi et al.,  
77 2016) Japan and Myanmar, (Beiromvand et al., 2024) Iran, (Zhou et al., 2019)  
78 China, (Jaleta et al., 2017) Cambodia and (Hunt et al., 2016) USA] plus the "dog  
79 only" type worms from this study and from Jaleta et al. (2017). The X axis shows  
80 the heterozygosity on the autosomes, the Y axis the heterozygosity on the X  
81 chromosome. The diagonal indicates equal heterozygosity on the X chromosome  
82 and the autosomes. The labels only refer the circled worms in the same colour as  
83 the label. Notice the high heterozygosity on the X chromosome in males

84 (squares) of the "dog only" type. In particular, compare the human derived  
85 worms with high heterozygosity from China (green) with the dog derived  
86 samples. For a discussion of the one female in the male group from China see  
87 Zhou et al. (2019). Notice that for the "dog only" worms the females are above  
88 the diagonal while the males are on or below the diagonal, indicating inflated X  
89 chromosomal heterozygosity in females as well. For the details of the analysis  
90 see Materials and Methods in the main text of this publication.

91

92

93 Fig. Suppl\_File\_3\_2: Read coverage of individual male and female worms. The  
94 reads from single worm Illumina sequencing were aligned with the reference  
95 genome (Hunt et al., 2016) and for each position the coverage was determined.  
96 The x-axes show the coverage, the y-axes show the number of positions with the  
97 corresponding coverage for the autosomes (blue) and the X chromosome (red).  
98 the % indicate the relative coverage of the X chromosome compared with the  
99 autosomes. Notice that due to the uneven amplification of the genomic DNA in  
100 the highly polyploid nuclei of the distal gonad the X chromosome is  
101 underrepresented in free living adults of both sexes (Hunt et al., 2016; Kulkarni  
102 et al., 2016). (A,B) females and (C,D) males of the reference isolate (data from  
103 Hunt et al. (2016)). (E-H) worms from the study by Zhou et al. (2019) in China.  
104 (E) infective larva, which is female but has no polyploid germline cells. (F-H)  
105 males that have high heterozygosity on the autosomes but not on the X  
106 chromosome. The coverage of the X chromosome is comparable with the one in  
107 the reference males, confirming that these males have only one X chromosome.  
108 Notice that no free-living females were found by Zhou et al. (2019). (I,K) dog only

109 type worms from Jaleta et al., (2017) that have high apparent heterozygosity on  
110 the autosomes and on the X chromosome (Fig. Suppl\_File\_3\_1). The coverage of  
111 the X chromosome is comparable with the reference males suggesting these  
112 males have only one X chromosome. Notice the rather high number of low or  
113 completely not covered positions and the irregular shape of the graph towards  
114 the left of the graph. We think that this is caused by the rather large sequence  
115 and genome structural differences between these sequences and the reference  
116 sequence. The sequencing depth in the Bangladesh study (this manuscript) was  
117 lower such that a reliable quantitative comparison between the sexes was not  
118 possible, but the coverage of the X in males was clearly lower than in females in  
119 this study as well.

120

121 Fig. Suppl\_File\_3\_3: Distribution of heterozygous positions over the three largest  
122 X chromosomal contigs (A) and over the two largest autosomal scaffolds (B). The  
123 x-axes show the position along the contig/scaffold and the y-axes show the  
124 number of apparently heterozygous positions per 10 kb window. The black lines  
125 represent the running means. Three females and the one male from the "dog only  
126 clade" of this study are shown. Notice the very low number of heterozygous  
127 positions on the X chromosome in the male over most of the X chromosomal  
128 contigs and the apparent hotspots (arrows). The same hotspots are also visible  
129 in the females. Hotspots are also present on the autosomes, although less  
130 frequent (notice that the autosomal scaffolds are much longer than the X  
131 chromosomal ones.

132

133 **References**

- 134
- 135
- 136 Aupalee, K., Wijit, A., Singphai, K., Rodelsperger, C., Zhou, S., Saeung, A., Streit, A.,  
137 2020. Genomic studies on *Strongyloides stercoralis* in northern and  
138 western Thailand. *Parasites & vectors* 13, 250.
- 139 Beiromvand, M., Ashiri, A., de Ree, V., Harbecke, D., Rödelsperger, C., Streit, A.,  
140 Rafiei, A., 2024. *Strongyloides stercoralis* genotyping in a human  
141 population in southwestern Iran. *Parasites & vectors* 17, 21.
- 142 Hammond, M.P., Robinson, R.D., 1994. Endoreplication in the ovary, testis, and  
143 intestine of *Strongyloides stercoralis*. *J Parasitol* 80, 905-910.
- 144 Hunt, V.L., Tsai, I.J., Coghlan, A., Reid, A.J., Holroyd, N., Foth, B.J., Tracey, A., Cotton,  
145 J.A., Stanley, E.J., Beasley, H., Bennett, H.M., Brooks, K., Harsha, B., Kajitani,  
146 R., Kulkarni, A., Harbecke, D., Nagayasu, E., Nichol, S., Ogura, Y., Quail, M.A.,  
147 Randle, N., Xia, D., Brattig, N.W., Soblik, H., Ribeiro, D.M., Sanchez-Flores,  
148 A., Hayashi, T., Itoh, T., Denver, D.R., Grant, W., Stoltzfus, J.D., Lok, J.B.,  
149 Murayama, H., Wastling, J., Streit, A., Kikuchi, T., Viney, M., Berriman, M.,  
150 2016. The genomic basis of parasitism in the *Strongyloides* clade of  
151 nematodes. *Nat Genet* 48, 299-307.
- 152 Jaleta, T.G., Zhou, S., Bemm, F.M., Schar, F., Khieu, V., Muth, S., Odermatt, P., Lok,  
153 J.B., Streit, A., 2017. Different but overlapping populations of *Strongyloides*  
154 *stercoralis* in dogs and humans-Dogs as a possible source for zoonotic  
155 strongyloidiasis. *PLoS Negl Trop Dis* 11, e0005752.
- 156 Kikuchi, T., Hino, A., Tanaka, T., Aung, M.P., Afrin, T., Nagayasu, E., Tanaka, R.,  
157 Higashiarakawa, M., Win, K.K., Hirata, T., Htike, W.W., Fujita, J., Maruyama,  
158 H., 2016. Genome-Wide Analyses of Individual *Strongyloides stercoralis*  
159 (Nematoda: Rhabditoidea) Provide Insights into Population Structure and  
160 Reproductive Life Cycles. *PLoS Negl Trop Dis* 10, e0005253.
- 161 Kulkarni, A., Holz, A., Rodelsperger, C., Harbecke, D., Streit, A., 2016. Differential  
162 chromatin amplification and chromosome complements in the germline  
163 of Strongyloididae (Nematoda). *Chromosoma* 125, 125-136.
- 164 Zhou, S., Fu, X., Pei, P., Kucka, M., Liu, J., Tang, L., Zhan, T., He, S., Chan, Y.F.,  
165 Rödelsperger, C., Liu, D., Streit, A., 2019. Characterization of a non-sexual  
166 population of *Strongyloides stercoralis* with hybrid 18S rDNA haplotypes  
167 in Guangxi, Southern China. *PLoS Negl Trop Dis* 13, e0007396.
- 168

Heterozygosity X-chromosome

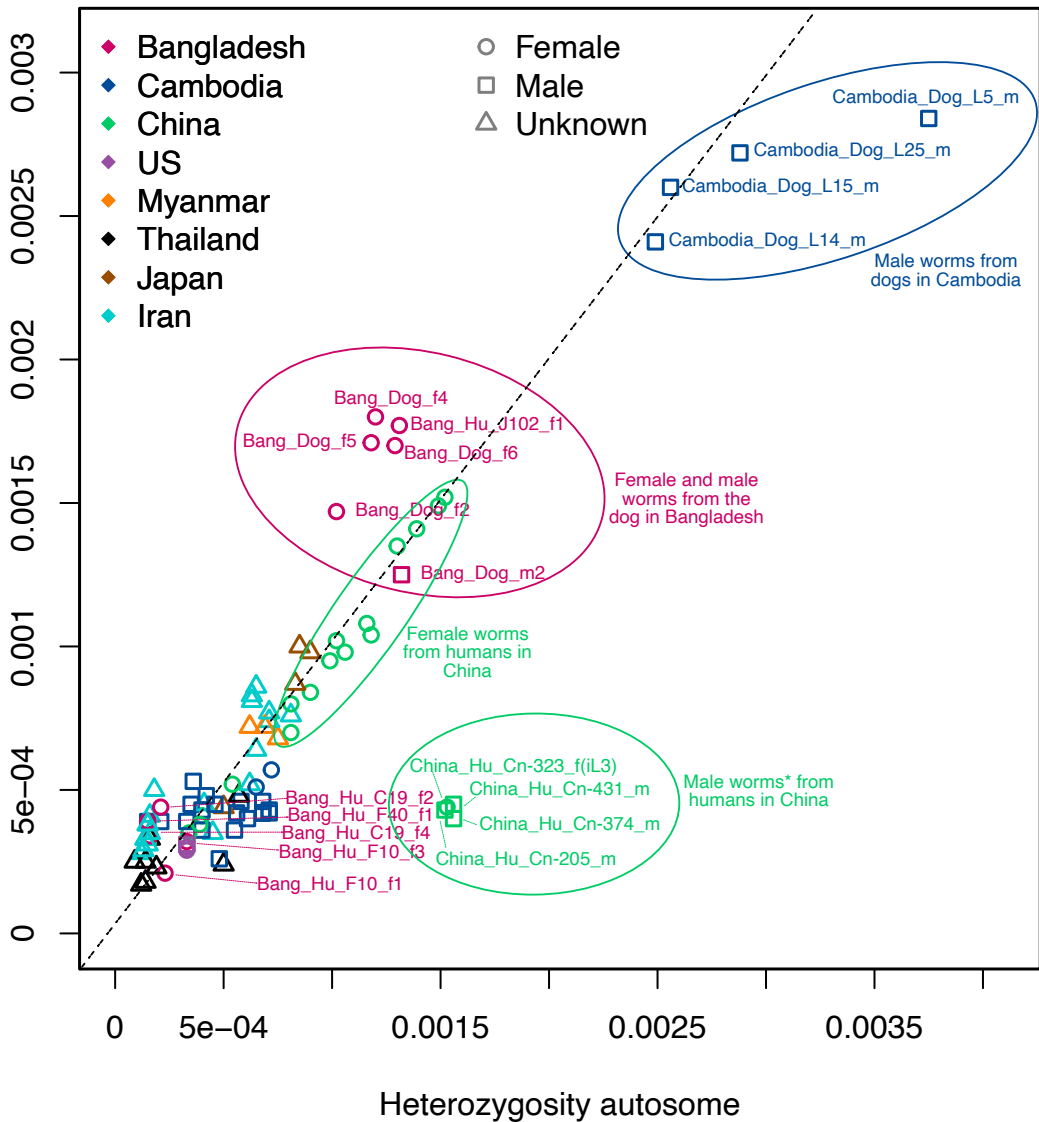



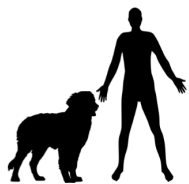

Reference isolate

Chinese isolate

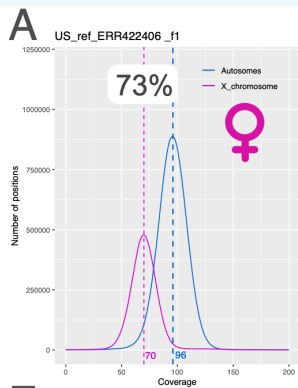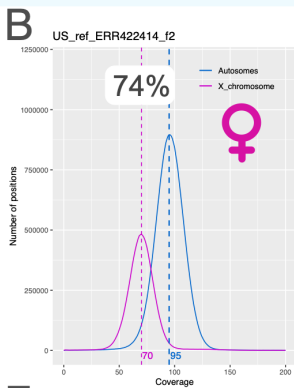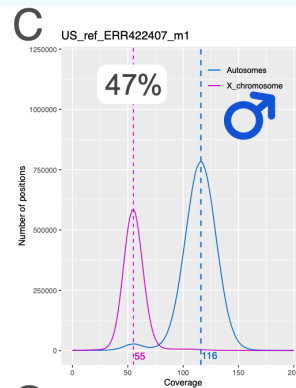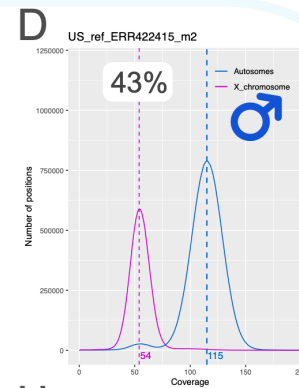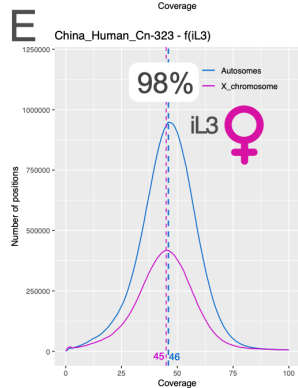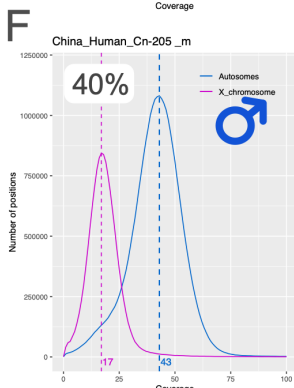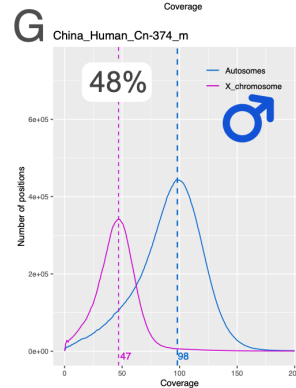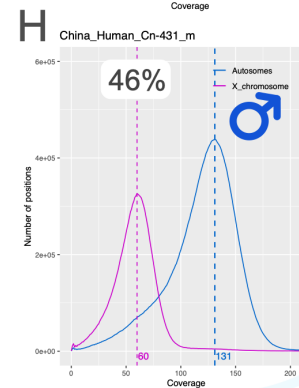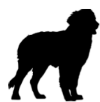

Cambodian isolate

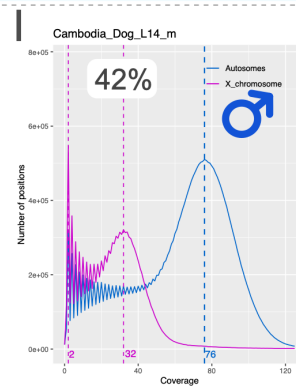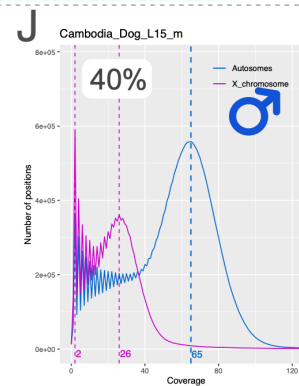

Fig\_Suppl\_file\_3 3

X chromosome

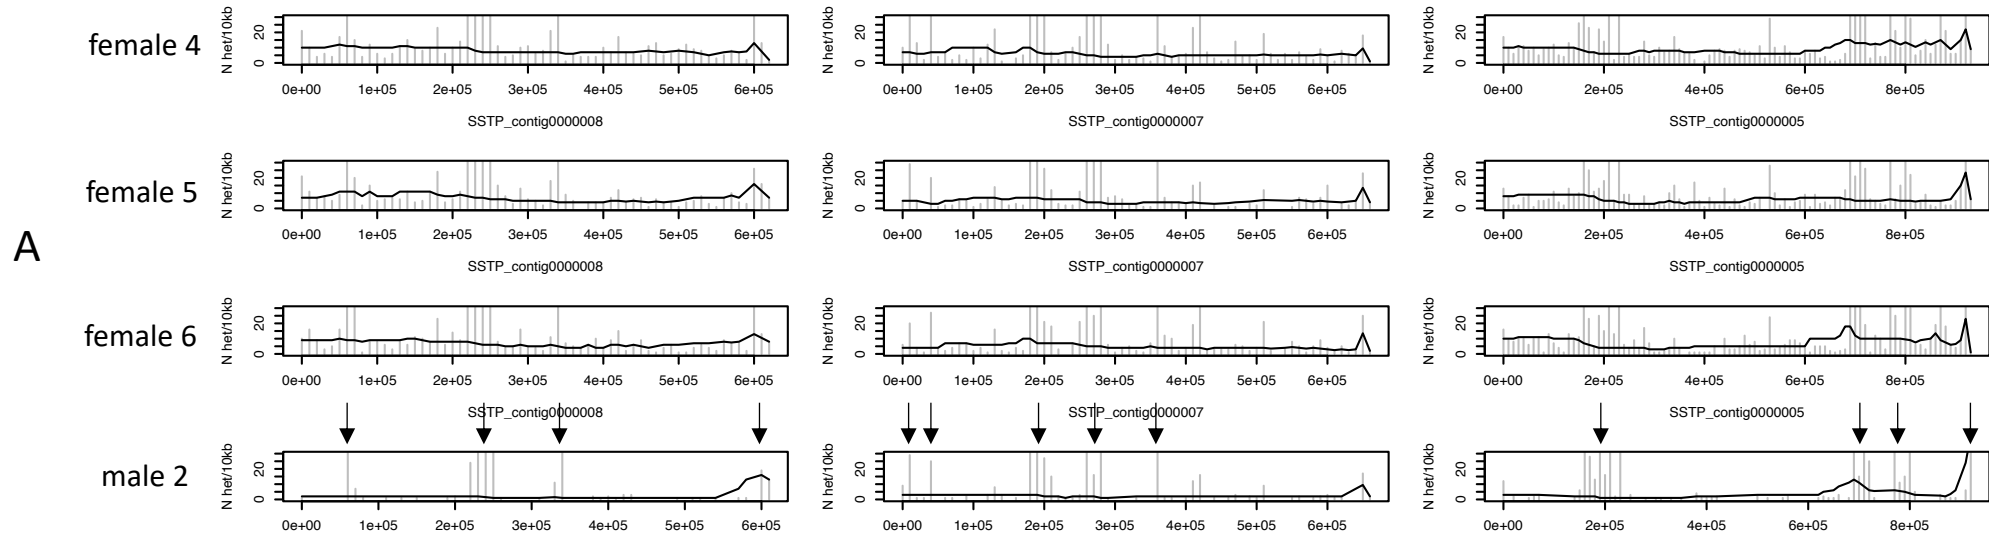

autosome

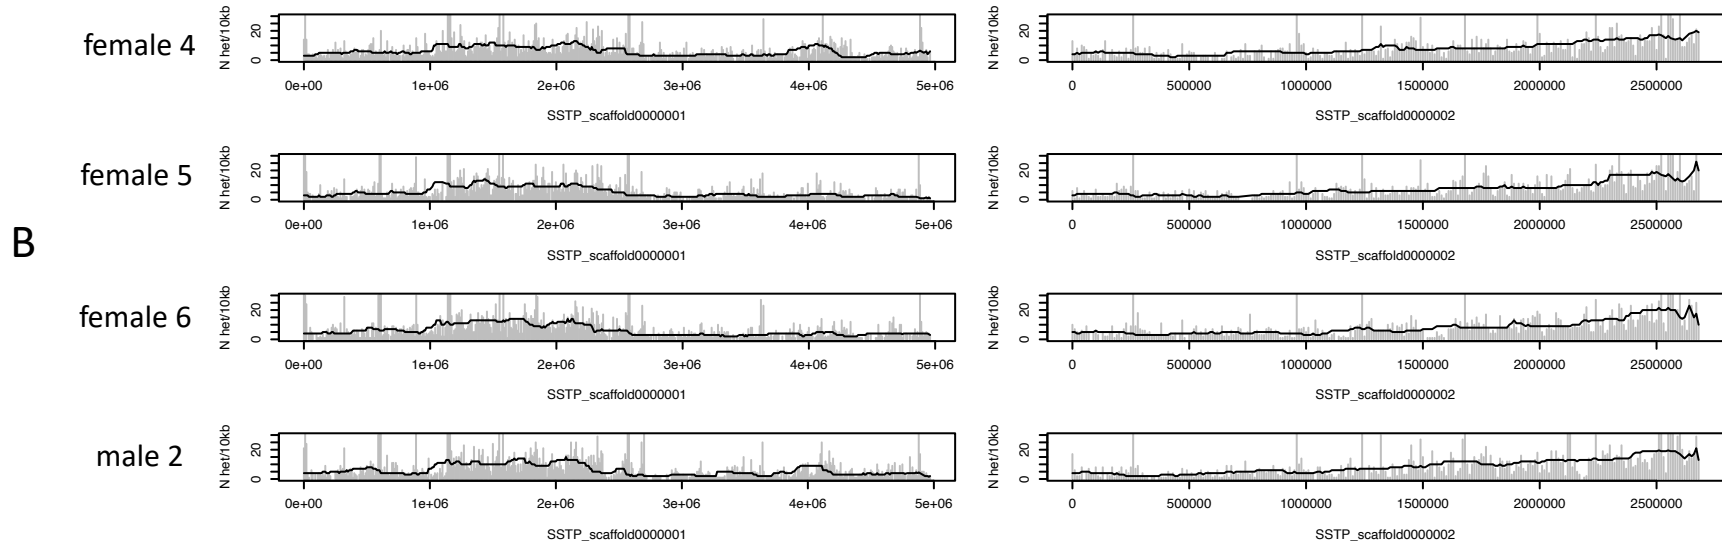

Supplement: Supplementary file [file media-7.pdf]
